# Supplementary material for: Stable hydrogen-bonded organic frameworks for selective fluorescence detection of Al3+ and Fe3+ ions
Source: Royal Society of Chemistry journal article supplement (doi:10.1039/d1ce01182k), 2021-01-01
Supplement: d1ce01182k1.pdf [file d1ce01182k1.pdf]

## ***Electronic Supplementary Information (ESI)***

### **Stable hydrogen-bonded organic frameworks for selective fluorescence detection of Al<sup>3+</sup> and Fe<sup>3+</sup> ions**

Cheng-Quan Xiao, Wen-Hai Yi, Jun-Jie Hu, Sui-Jun Liu\* and He-Rui Wen\*

School of Chemistry and Chemical Engineering, Jiangxi University of Science and Technology, Ganzhou 341000, Jiangxi Province, P.R. China.

E-mail: sjliu@jxust.edu.cn (S.-J. Liu), wenherui63@163.com (H.-R. Wen); Tel: +86-797-8312289, +86-797-8312204

**Table S1.** Hydrogen-bonding lengths (Å) and angles (°) for HOFs 1-4

| D-H···A       | Distance of D···A(Å) | Angle of D-H···A(°) |
|---------------|----------------------|---------------------|
| <b>HOF 1</b>  |                      |                     |
| O3–H3···N1    | 1.821                | 164.223             |
| O1A–H1A···O5C | 2.460                | 124.843             |
| O7–H7···N2B   | 1.785                | 174.308             |
| O4–H4···O1A   | 2.073                | 162.871             |
| O6D–H9D···O2  | 1.835                | 156.867             |
| <b>HOF 2</b>  |                      |                     |
| O4–H4···N1    | 1.784                | 172.250             |
| O10–H10···O3  | 1.958                | 163.256             |
| O6A–H6A···O9  | 1.925                | 158.795             |
| O2–H2···O10B  | 2.036                | 161.123             |
| O7–H7···N2C   | 1.833                | 166.666             |
| <b>HOF 3</b>  |                      |                     |
| O4–H4···N2    | 1.706                | 173.196             |
| O6–H6···N1    | 1.822                | 163.604             |
| O3–H3···O8A   | 1.747                | 151.491             |
| O1–H1···O5B   | 2.082                | 151.168             |
| <b>HOF 4</b>  |                      |                     |
| O3–H3A···N1A  | 1.638                | 162.814             |
| O7–H7···N3B   | 1.610                | 175.016             |
| O1–H8···O2C   | 2.611                | 139.389             |
| O2C–H2C···O9D | 1.992                | 163.202             |
| O5–H6···O6E   | 1.679                | 177.431             |

Symmetry codes for HOF 1: A: -x, 1-y, -z, B: x-2, 0.5-y, z-0.5, C: x, 0.5-y, z-0.5, D: 1-x, -y, 1-z. HOF 2: A 2-x, -y, 2-z, B: -x, 1-y, 1-z, C: 2+x, 0.5-y, 0.5+z. HOF 3: A: 1-x, -y, 2-z, B: 1-x, 1-y, 1-z. HOF 4: A: x+1, y, z, B: x-1, y, z, C: x+0.5, 0.5+y, z-0.5, D: -x, 1-y, 1-z, E: -x, -y, -z.

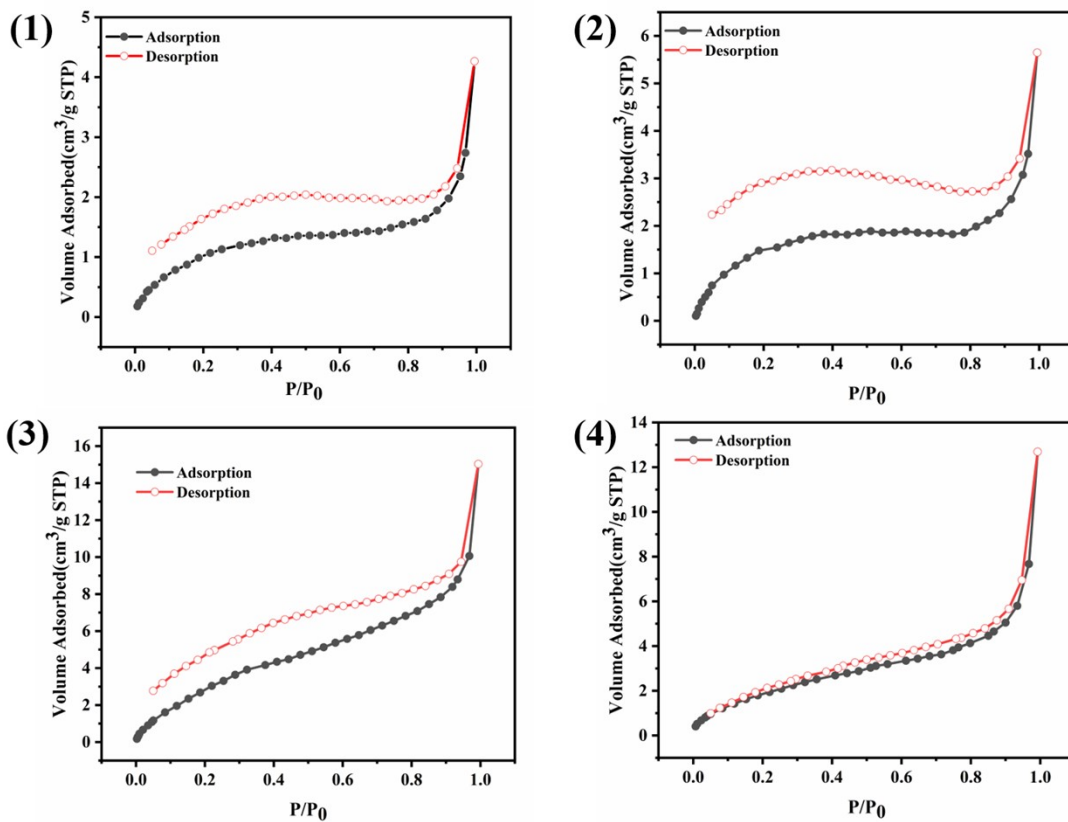

**Fig. S1.** The  $N_2$  sorption isotherms for 1-4 at 77 K.

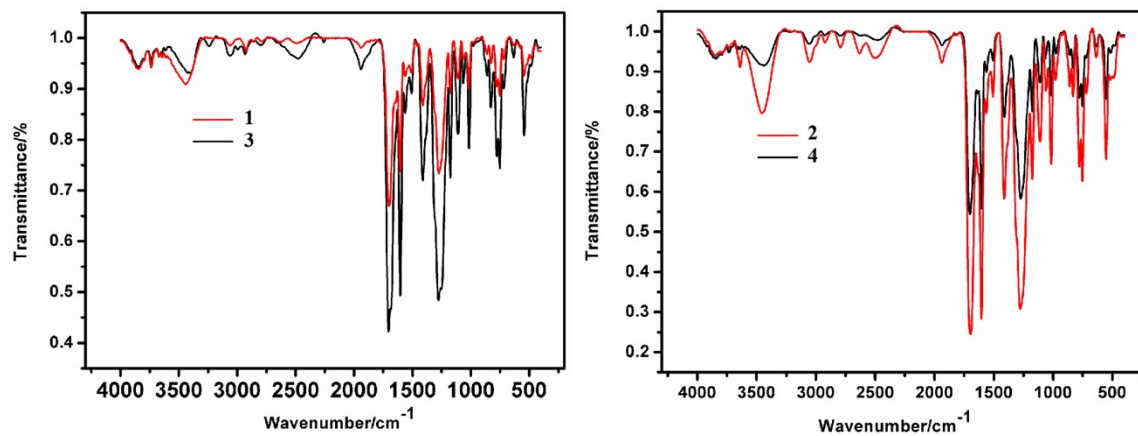

**Fig. S2.** IR spectra of 1-4.

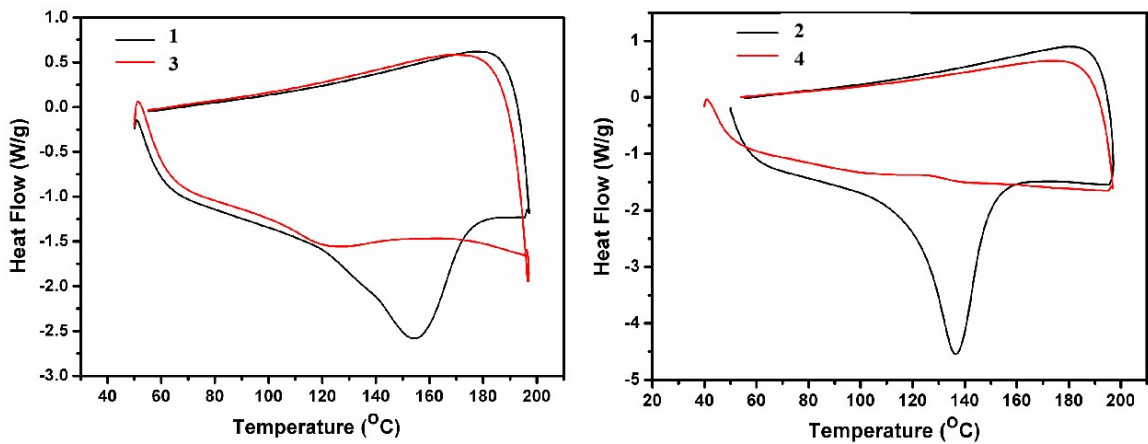

Fig. S3. DSC curves of 1–4 within 200 °C.

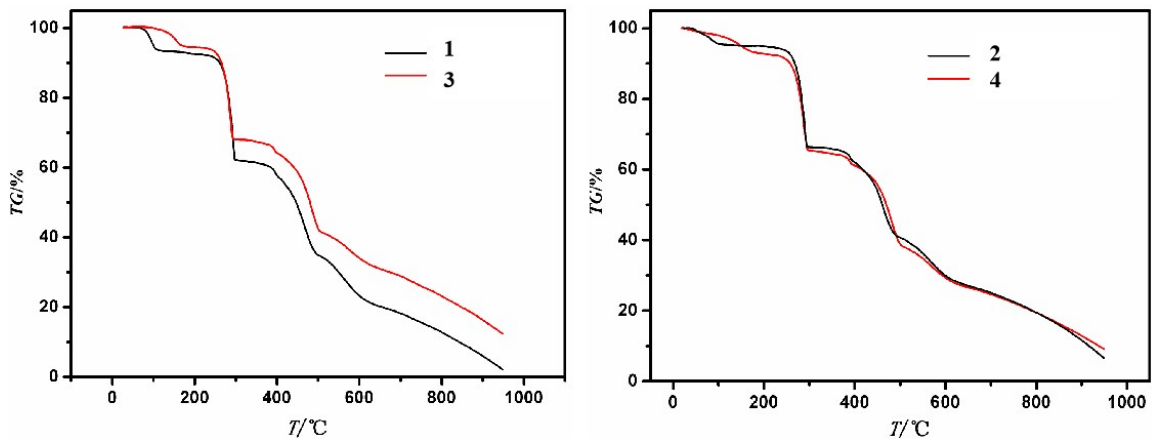

Fig. S4. TGA curves of 1–4 in the range of 25-950 °C under N<sub>2</sub> atmosphere.

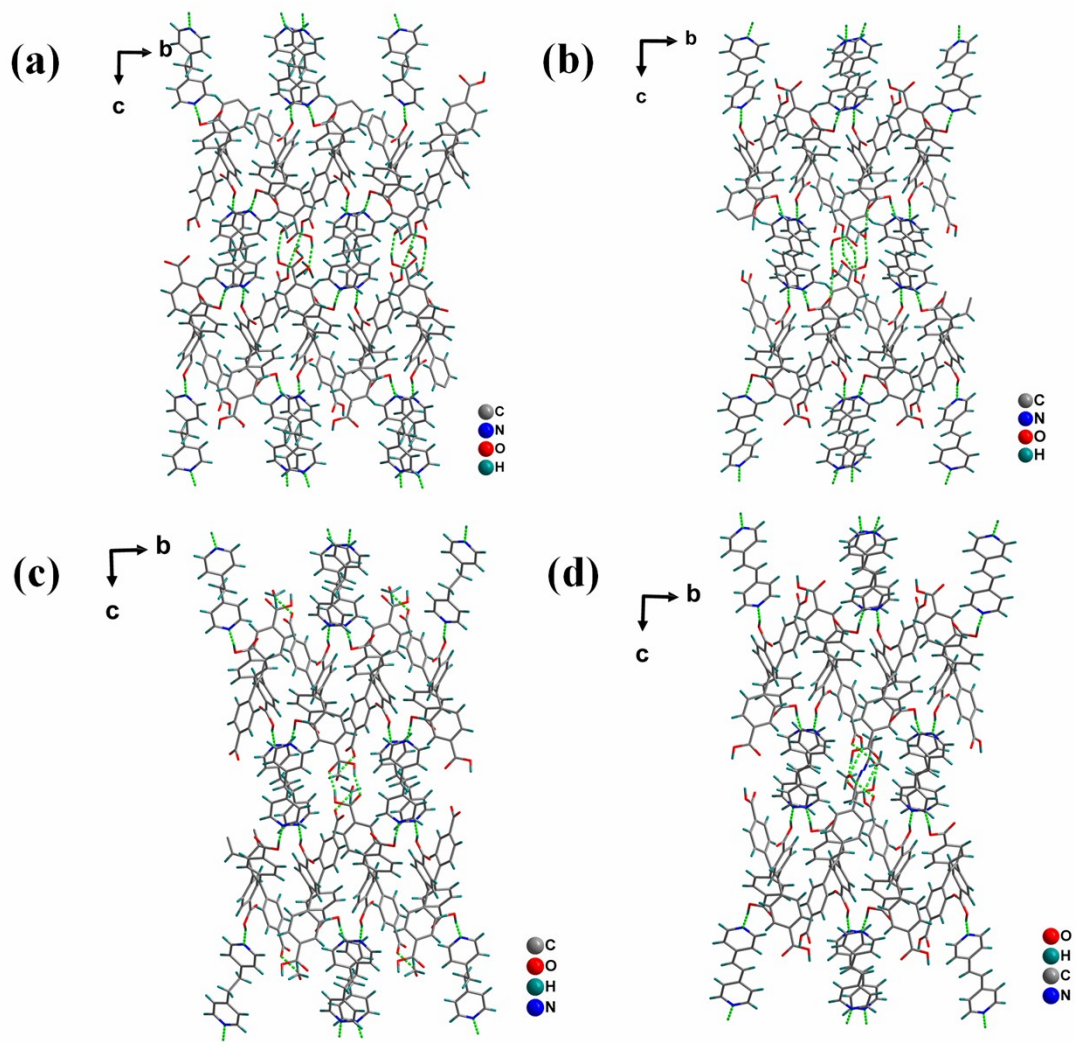

**Fig. S5.** 3D structure of HOFs 1–4 along the  $a$ -axis.

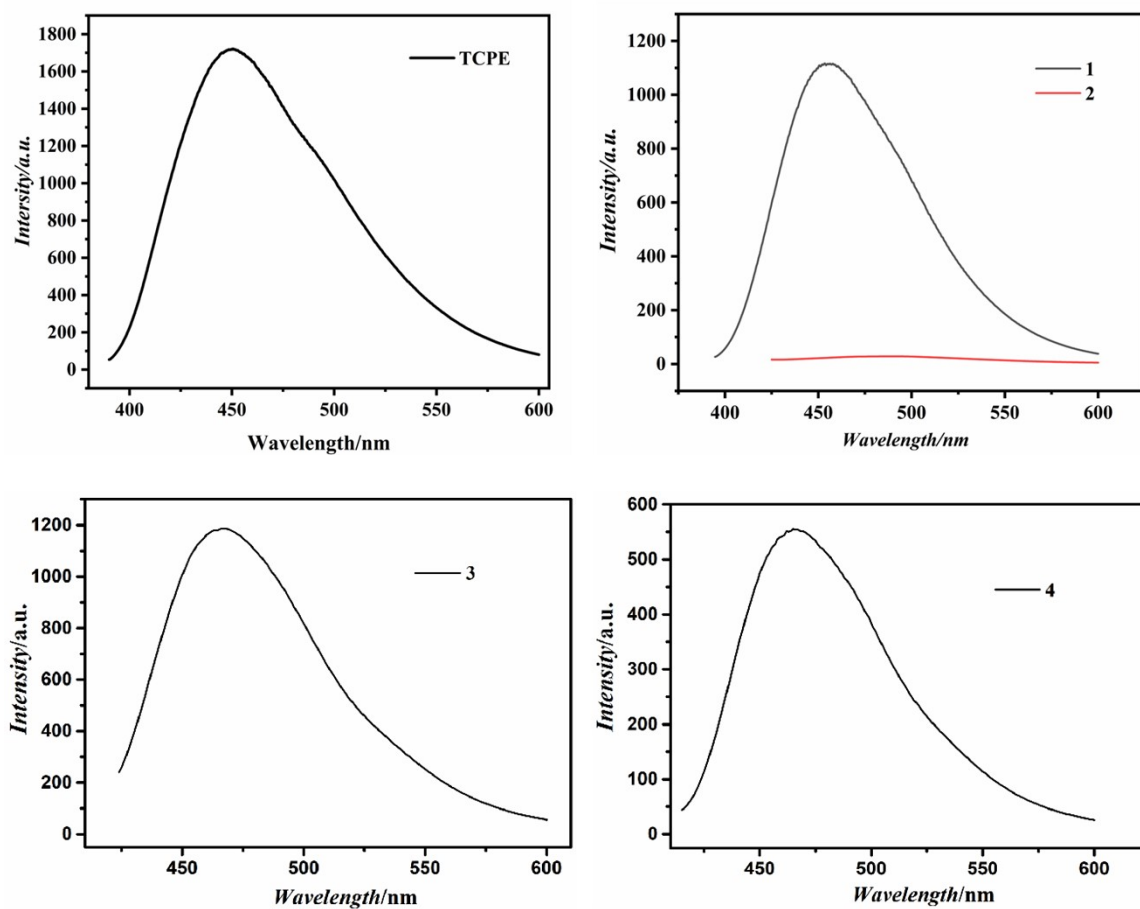

**Fig. S6.** Fluorescence spectra of TCPE and 1-4 at room temperature (excitation wavelength: 398 nm).

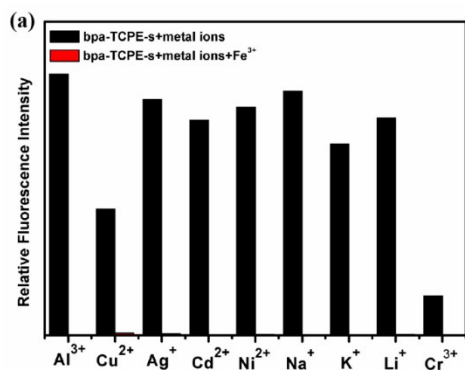

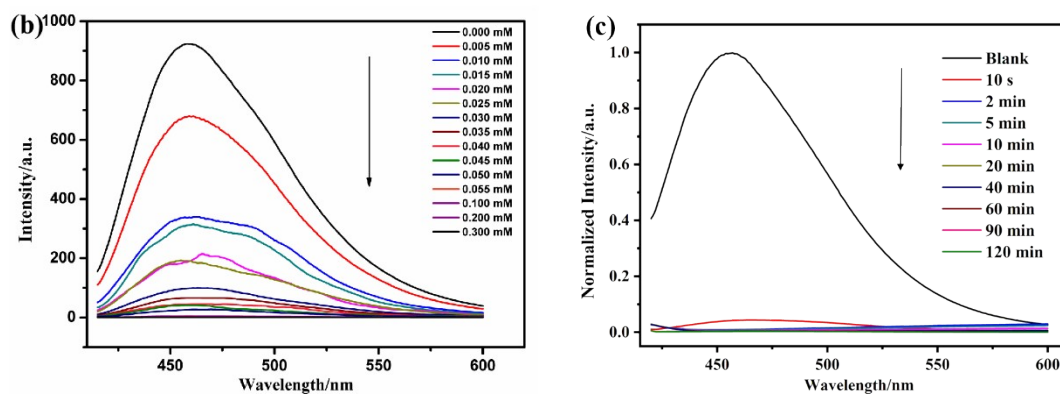

**Fig. S7** (a) The influence of interfering ions on the luminescence intensity of  $\text{Fe}^{3+}$  at room temperature; (b) the influence of  $\text{Fe}^{3+}$  with different concentration at room temperature on the liquid emission spectrum of **3**; (c) Time-dependent emission spectra of the suspension after adding  $\text{Fe}^{3+}$  (0.2 M) at room temperature ( $\lambda_{\text{ex}} = 396 \text{ nm}$ ).

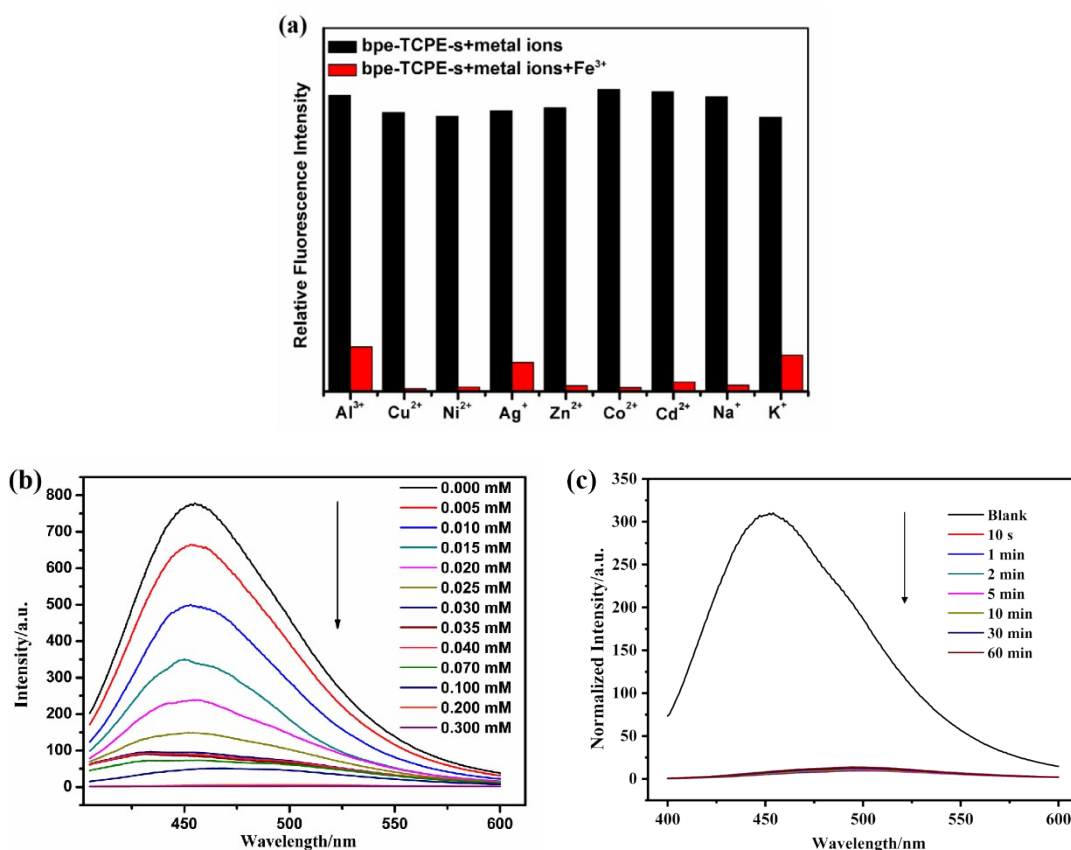

**Fig. S8** (a) The influence of interfering ions on the luminescence intensity of  $\text{Fe}^{3+}$  at room temperature; (b) the influence of  $\text{Fe}^{3+}$  with different concentration at room temperature on the liquid emission spectrum of **4**; (c) Time-dependent emission spectra of the suspension after adding  $\text{Fe}^{3+}$  (0.2 M) at room temperature ( $\lambda_{\text{ex}} = 376 \text{ nm}$ ).

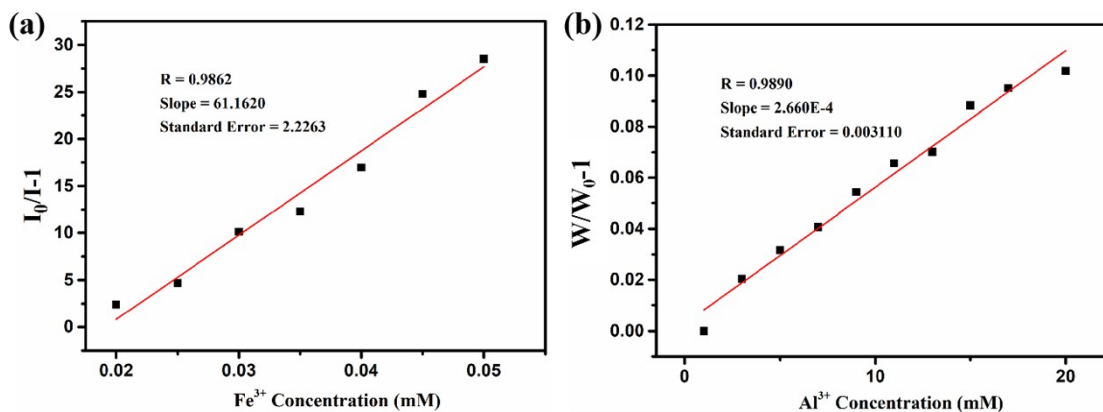

**Fig. S9.** Correlation between the luminescence of **3** and the concentration of  $Fe^{3+}$  (a) and  $Al^{3+}$  (b).

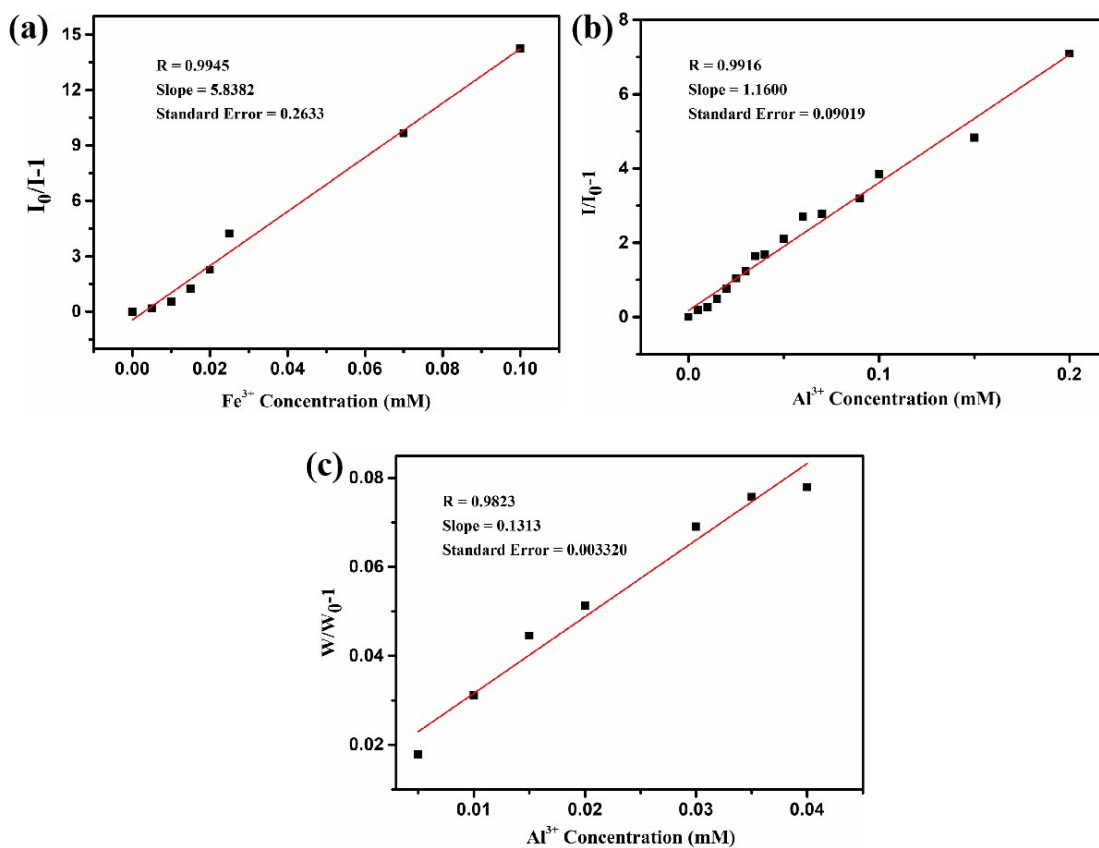

**Fig. S10.** (a) Correlation between the luminescence of **4** and the concentration of  $Fe^{3+}$ . (b) The photoluminescence intensities correlation between the luminescence of **4** and the concentration of  $Al^{3+}$ . (c) The fluorescence maximum peak wavelengths correlation between the luminescence of **4** and the concentration of  $Al^{3+}$ .



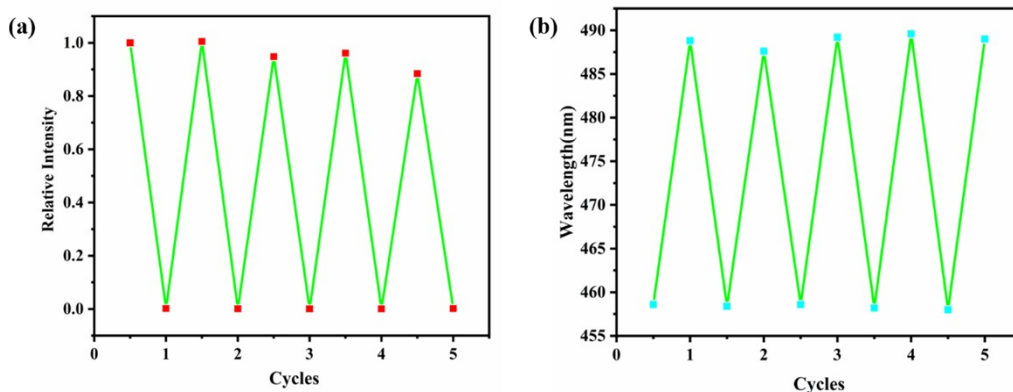

**Fig. S11.** Relative luminescent intensity of **3** after five runs of recycling experiments for (a)  $\text{Fe}^{3+}$ , and the red-shift emission of **3** after five runs of recycling experiments for (b)  $\text{Al}^{3+}$ .

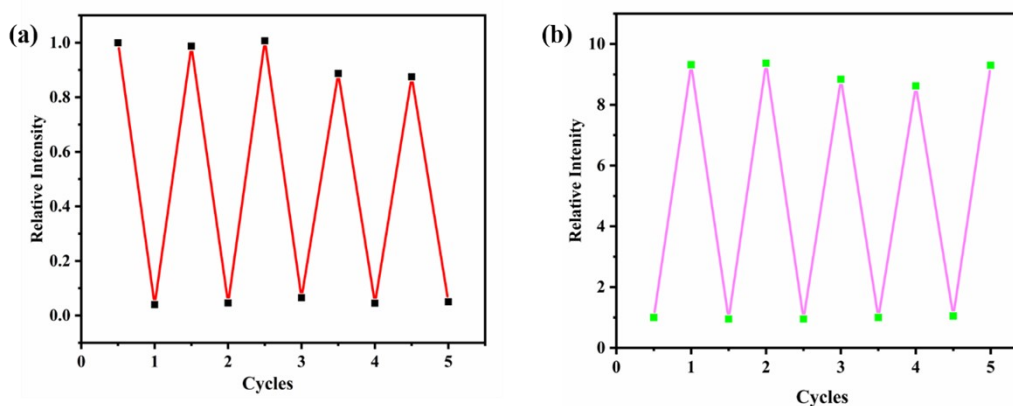

**Fig. S12.** Relative luminescent intensity of **4** after five runs of recycling experiments for (a)  $\text{Fe}^{3+}$ , and (b)  $\text{Al}^{3+}$ .

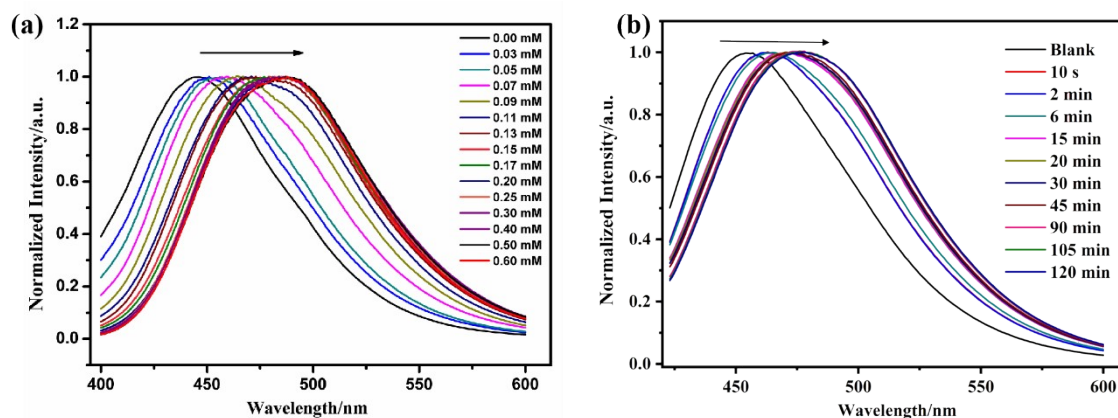

**Fig. S13.** (a) Liquid emission spectra of **3** upon the addition of different concentrations of  $\text{Al}^{3+}$  at room temperature; (b) Time-dependent emission spectra of the suspension after adding  $\text{Al}^{3+}$  (0.2 M) at room temperature ( $\lambda_{\text{ex}} = 396 \text{ nm}$ ).

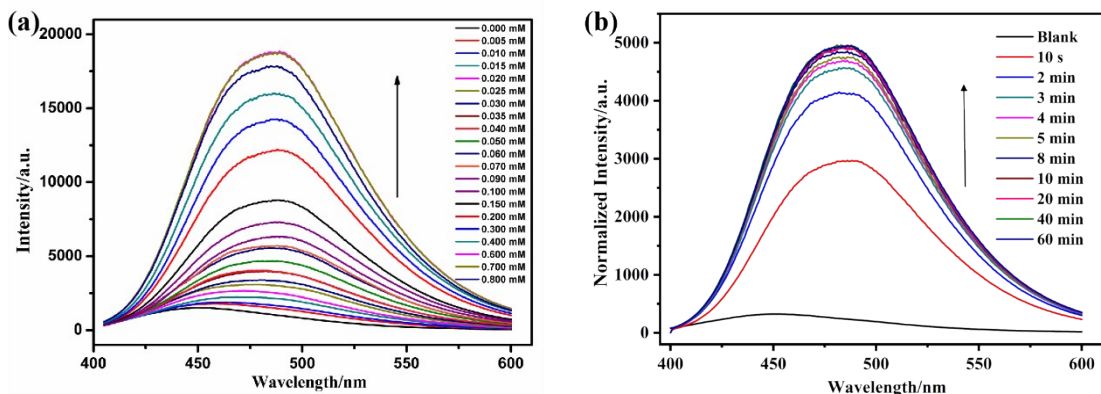

**Fig. S14.** (a) Liquid emission spectra of **4** upon addition of different concentrations of  $\text{Al}^{3+}$  at room temperature ( $\lambda_{\text{ex}} = 376 \text{ nm}$ ); (b) Time-dependent emission spectra of the suspension after adding  $\text{Al}^{3+}$  (0.2 M) at room temperature ( $\lambda_{\text{ex}} = 376 \text{ nm}$ ).

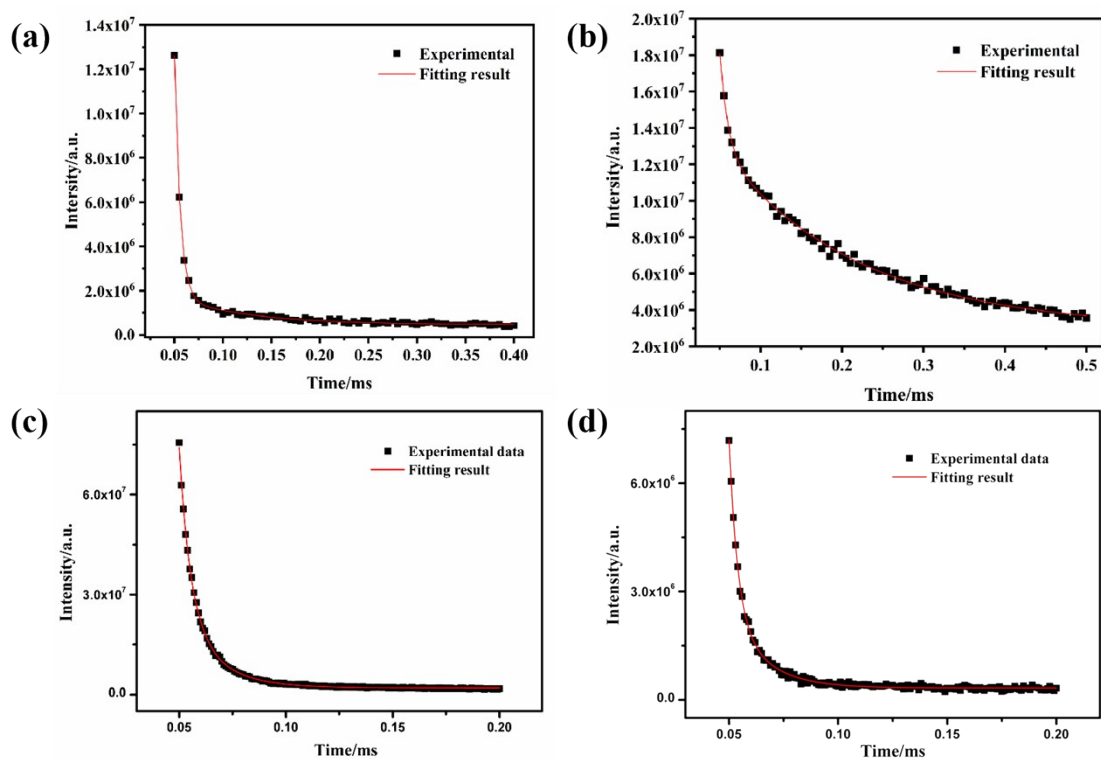

**Fig. S15.** The luminescence decay of HOFs **1**(a), **2**(b), **3**(c) and **4**(d), respectively ( $\lambda_{\text{ex}} = 398 \text{ nm}$ ,  $\lambda_{\text{em}} = 456 \text{ nm}$  for **1**,  $\lambda_{\text{ex}} = 398 \text{ nm}$ ,  $\lambda_{\text{em}} = 488 \text{ nm}$  for **2**,  $\lambda_{\text{ex}} = 398 \text{ nm}$ ,  $\lambda_{\text{em}} = 466 \text{ nm}$  for **3** and  $\lambda_{\text{ex}} = 398 \text{ nm}$ ,  $\lambda_{\text{em}} = 472 \text{ nm}$  for **4**).

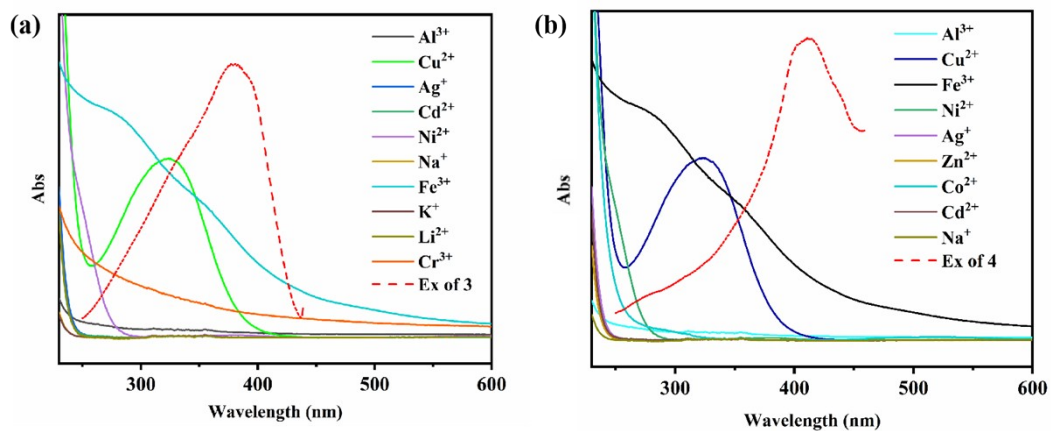

**Fig. S16.** UV-vis adsorption spectra of **3** upon the addition of different  $\text{M}(\text{NO}_3)_x$  and the excitation spectrum of **3** (a), and UV-vis adsorption spectra of **4** upon the addition of different  $\text{M}(\text{NO}_3)_x$  and the excitation spectrum of **4** (b).
